# Supplementary figures and images for: Copper-doped perylene diimide supramolecules combined with TiO2 for efficient photoactivity
Source: Royal Society of Chemistry journal article supplement (doi:10.1039/d3ra00965c), 2023-01-01

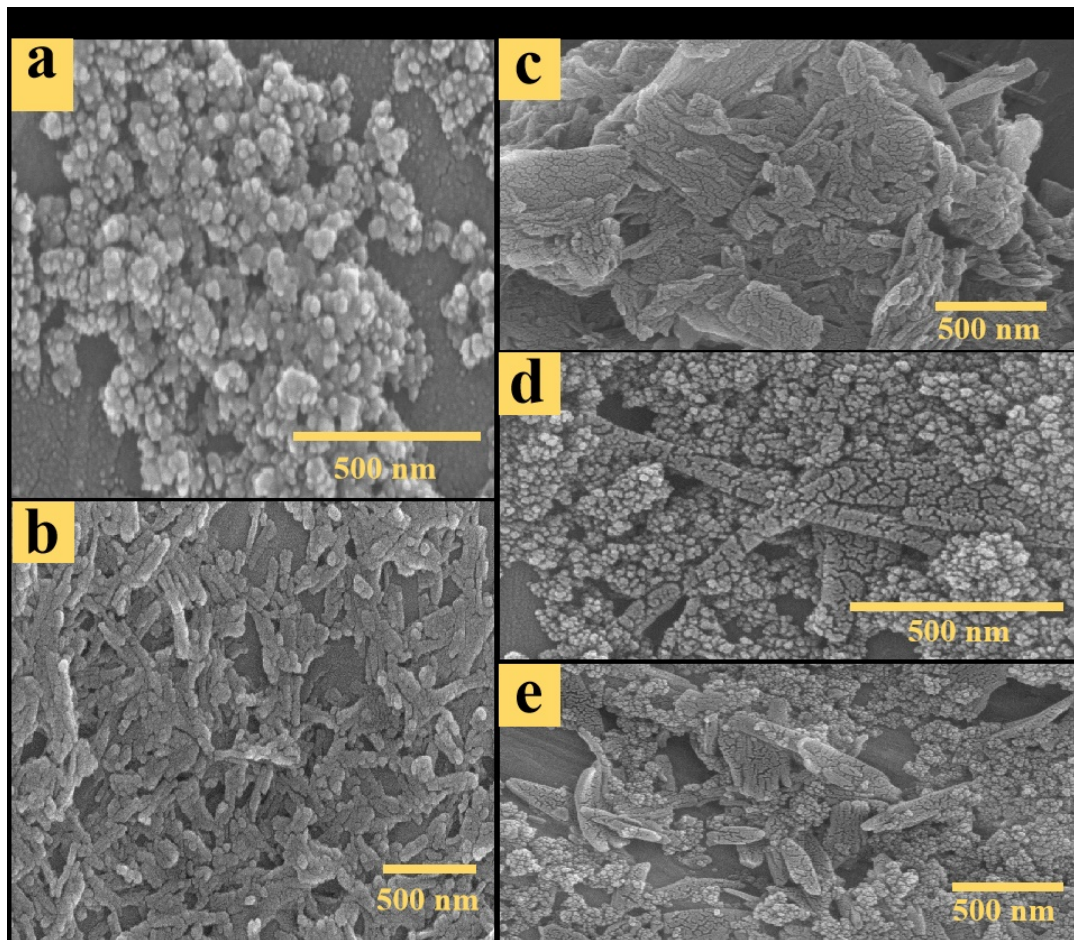

Supplement: d3ra00965c2.pdf [file d3ra00965c2.pdf]

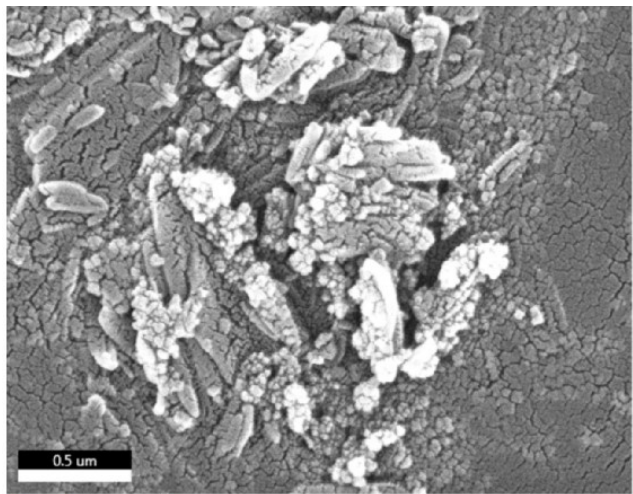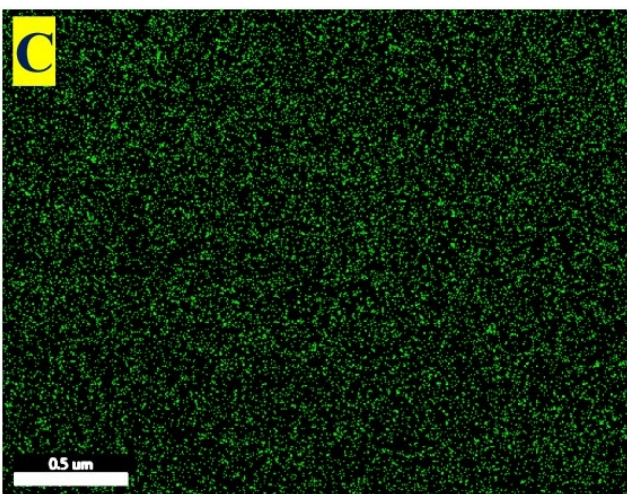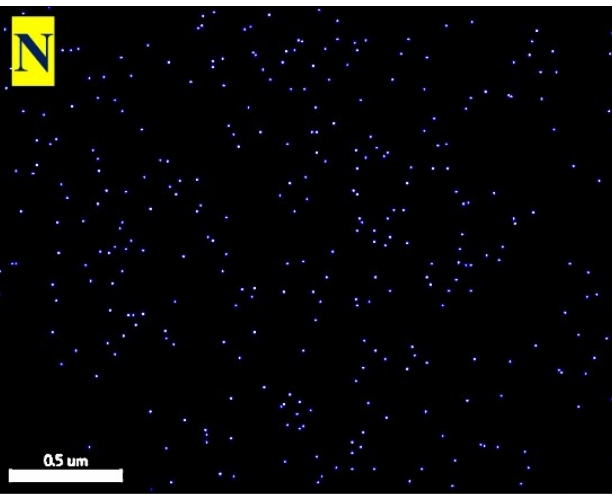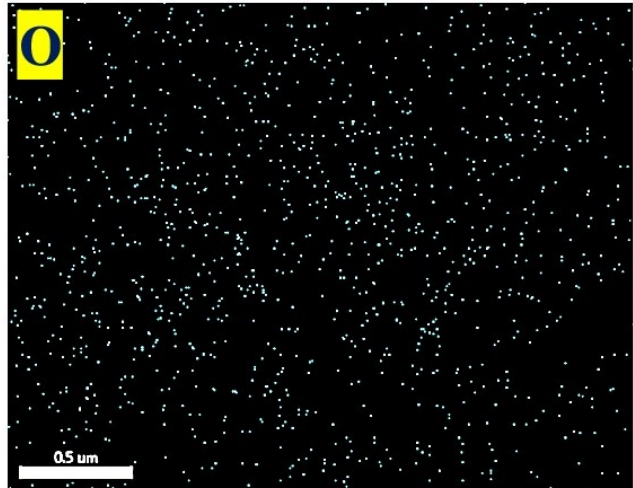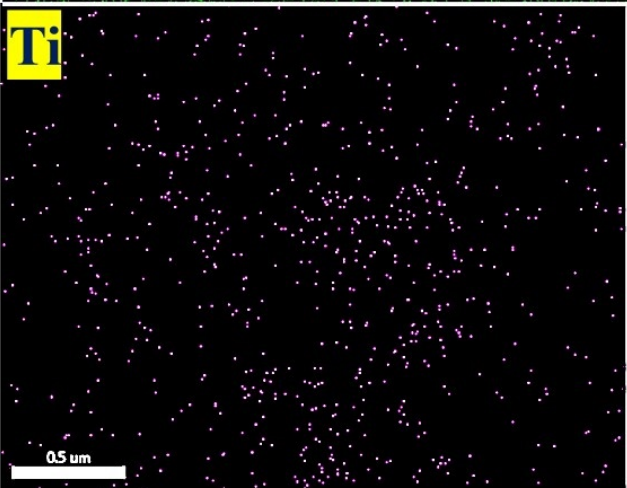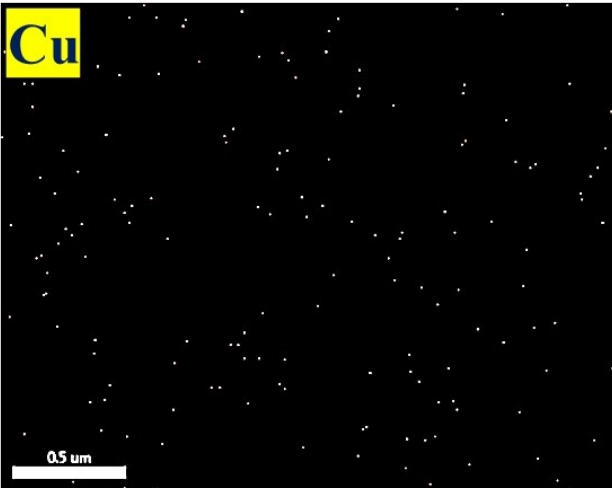

Supplement: d3ra00965c3.pdf [file d3ra00965c3.pdf]

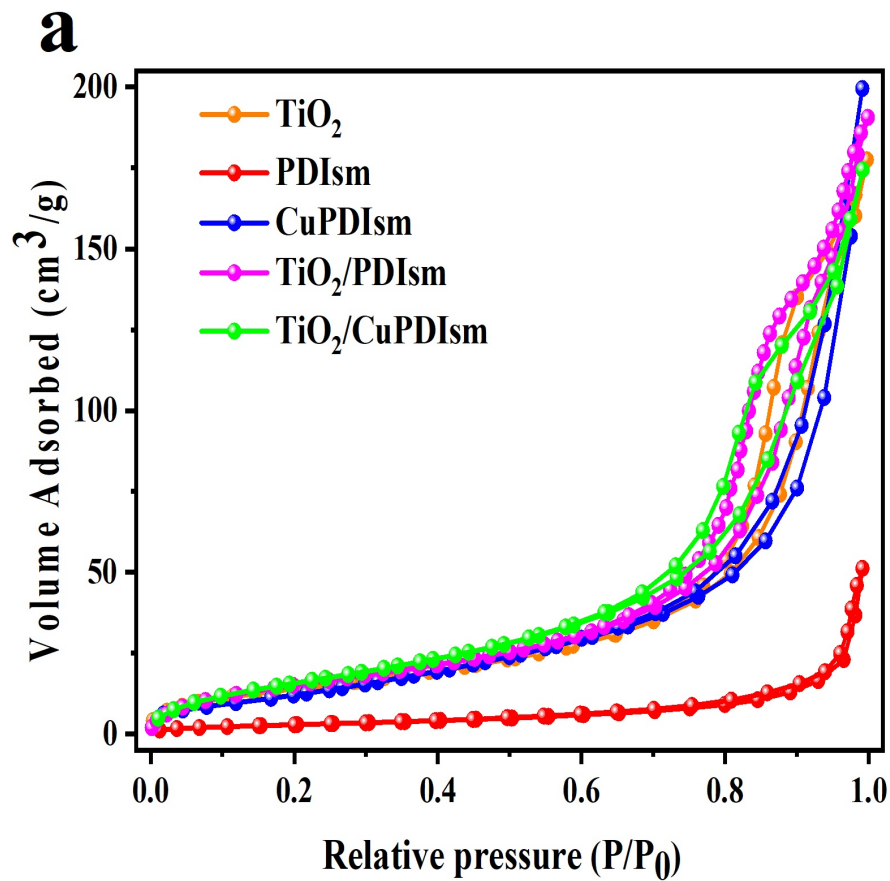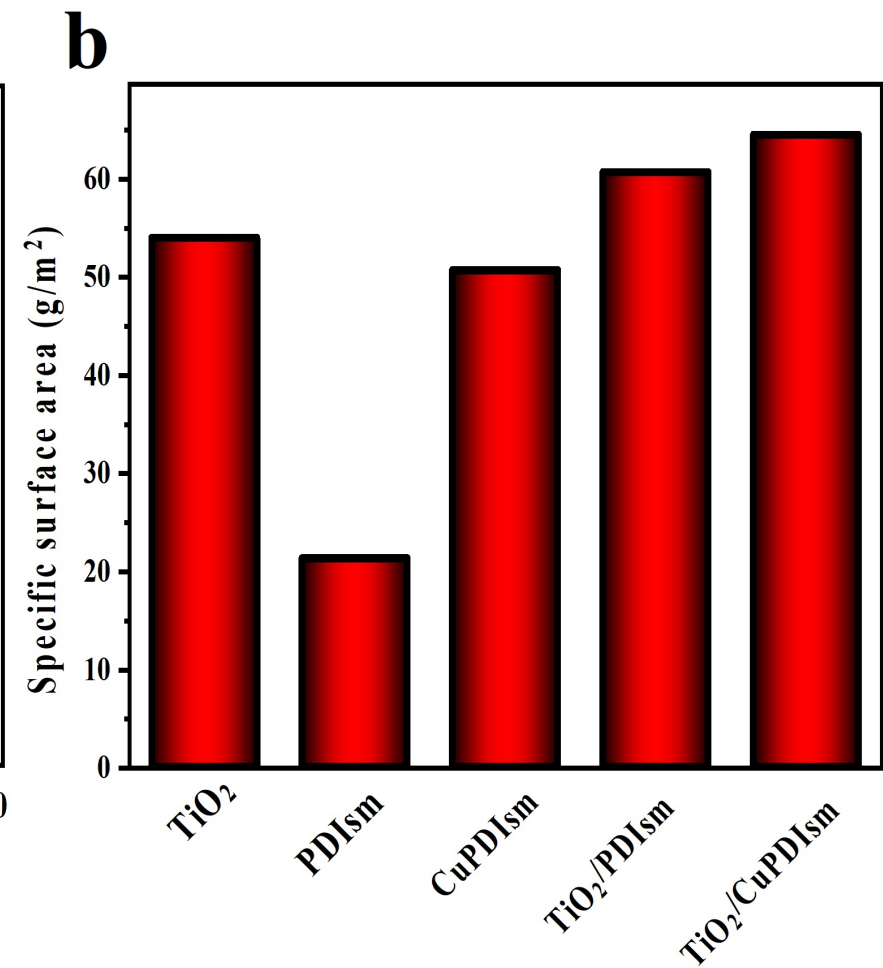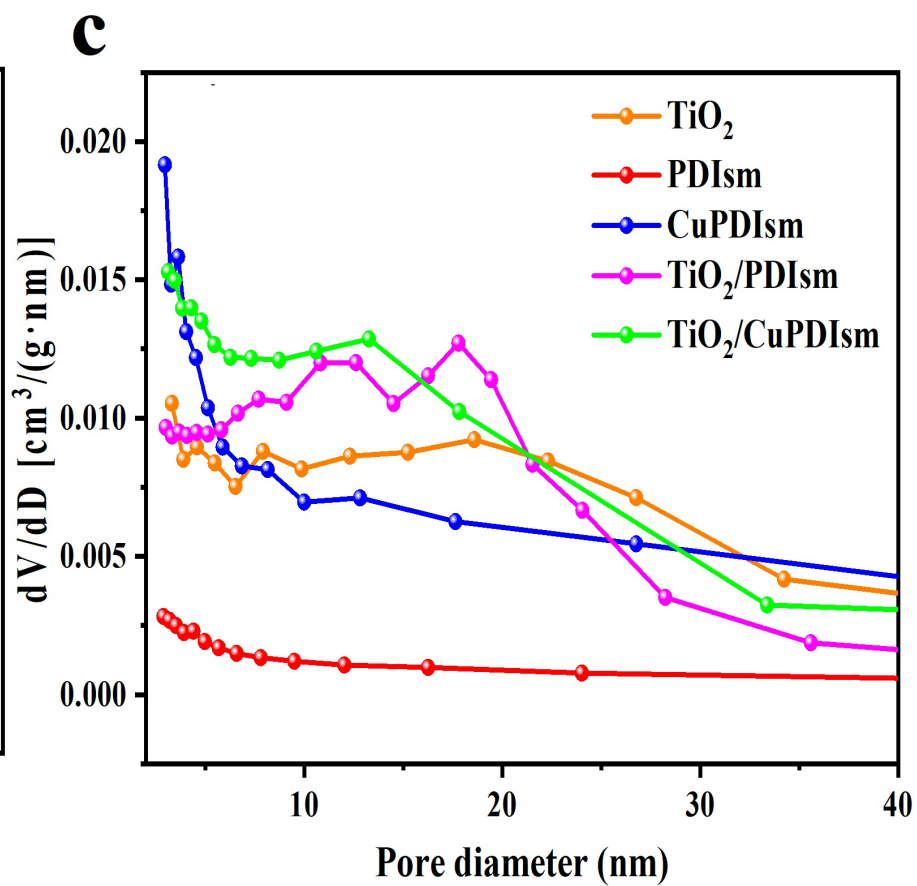

Supplement: d3ra00965c4.pdf [file d3ra00965c4.pdf]

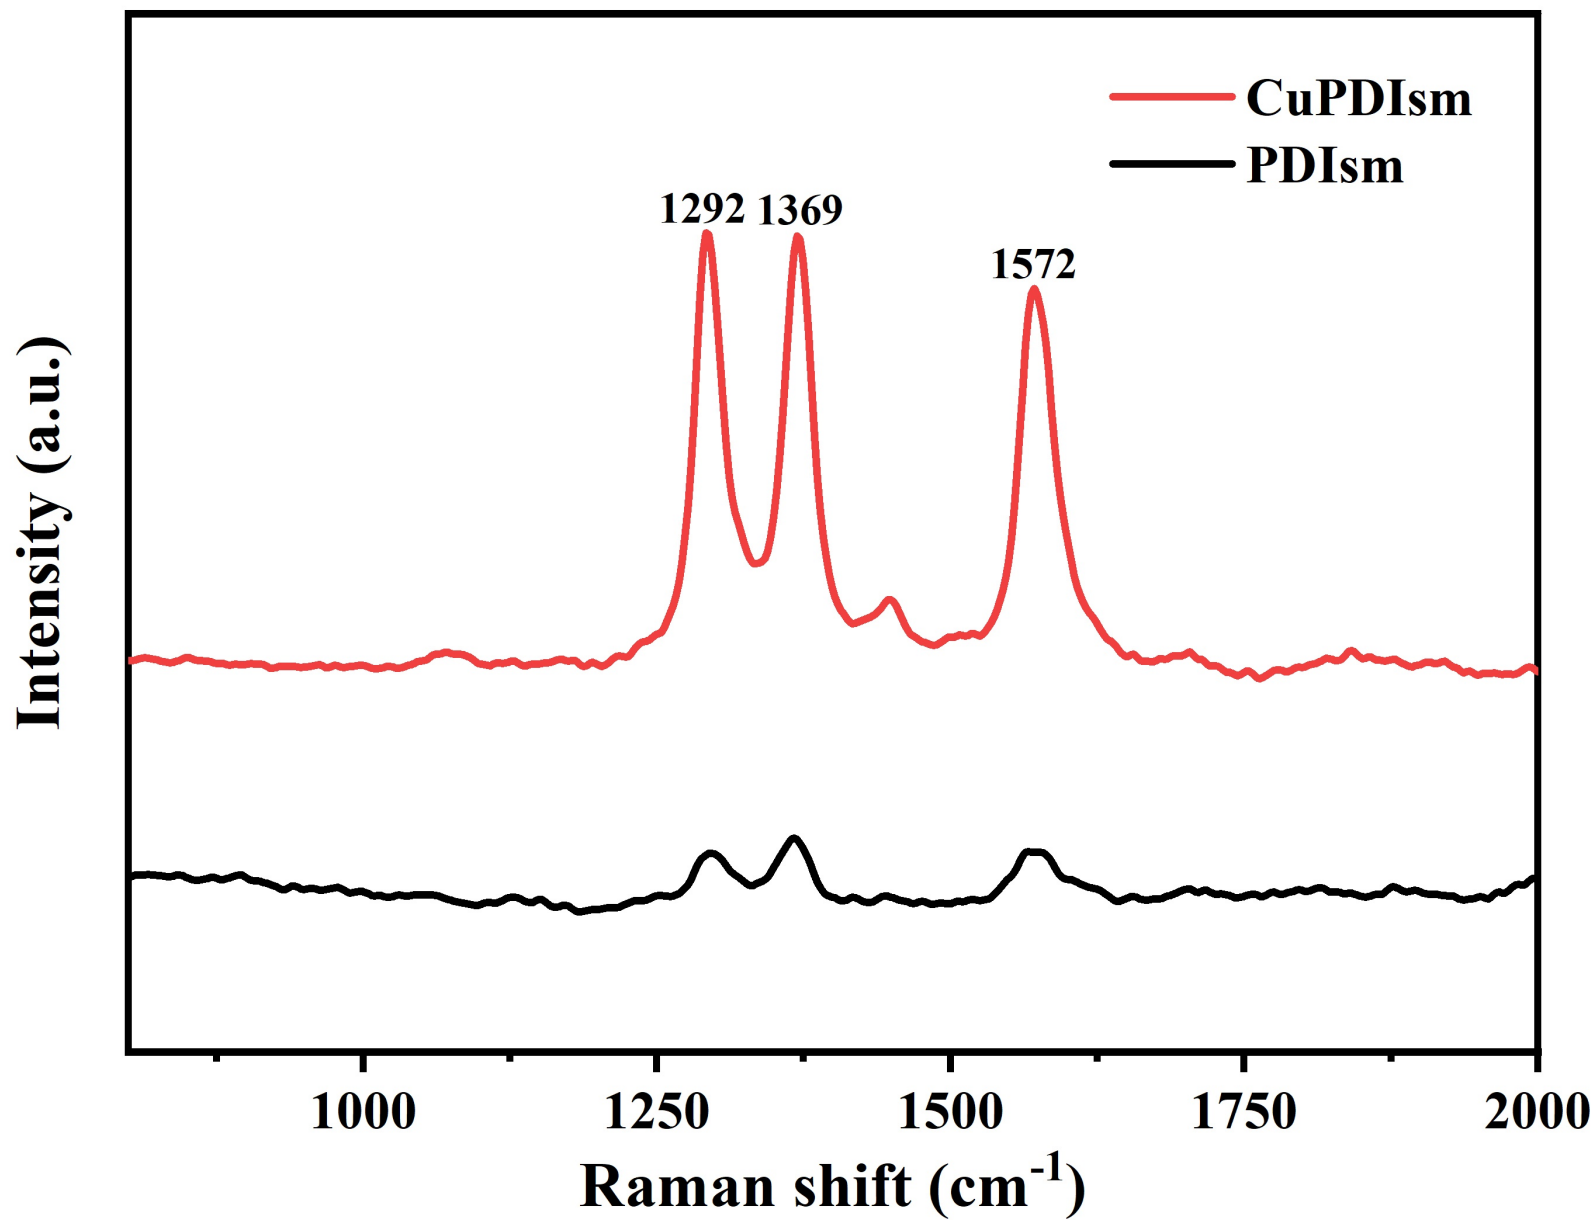

Supplement: d3ra00965c5.pdf [file d3ra00965c5.pdf]

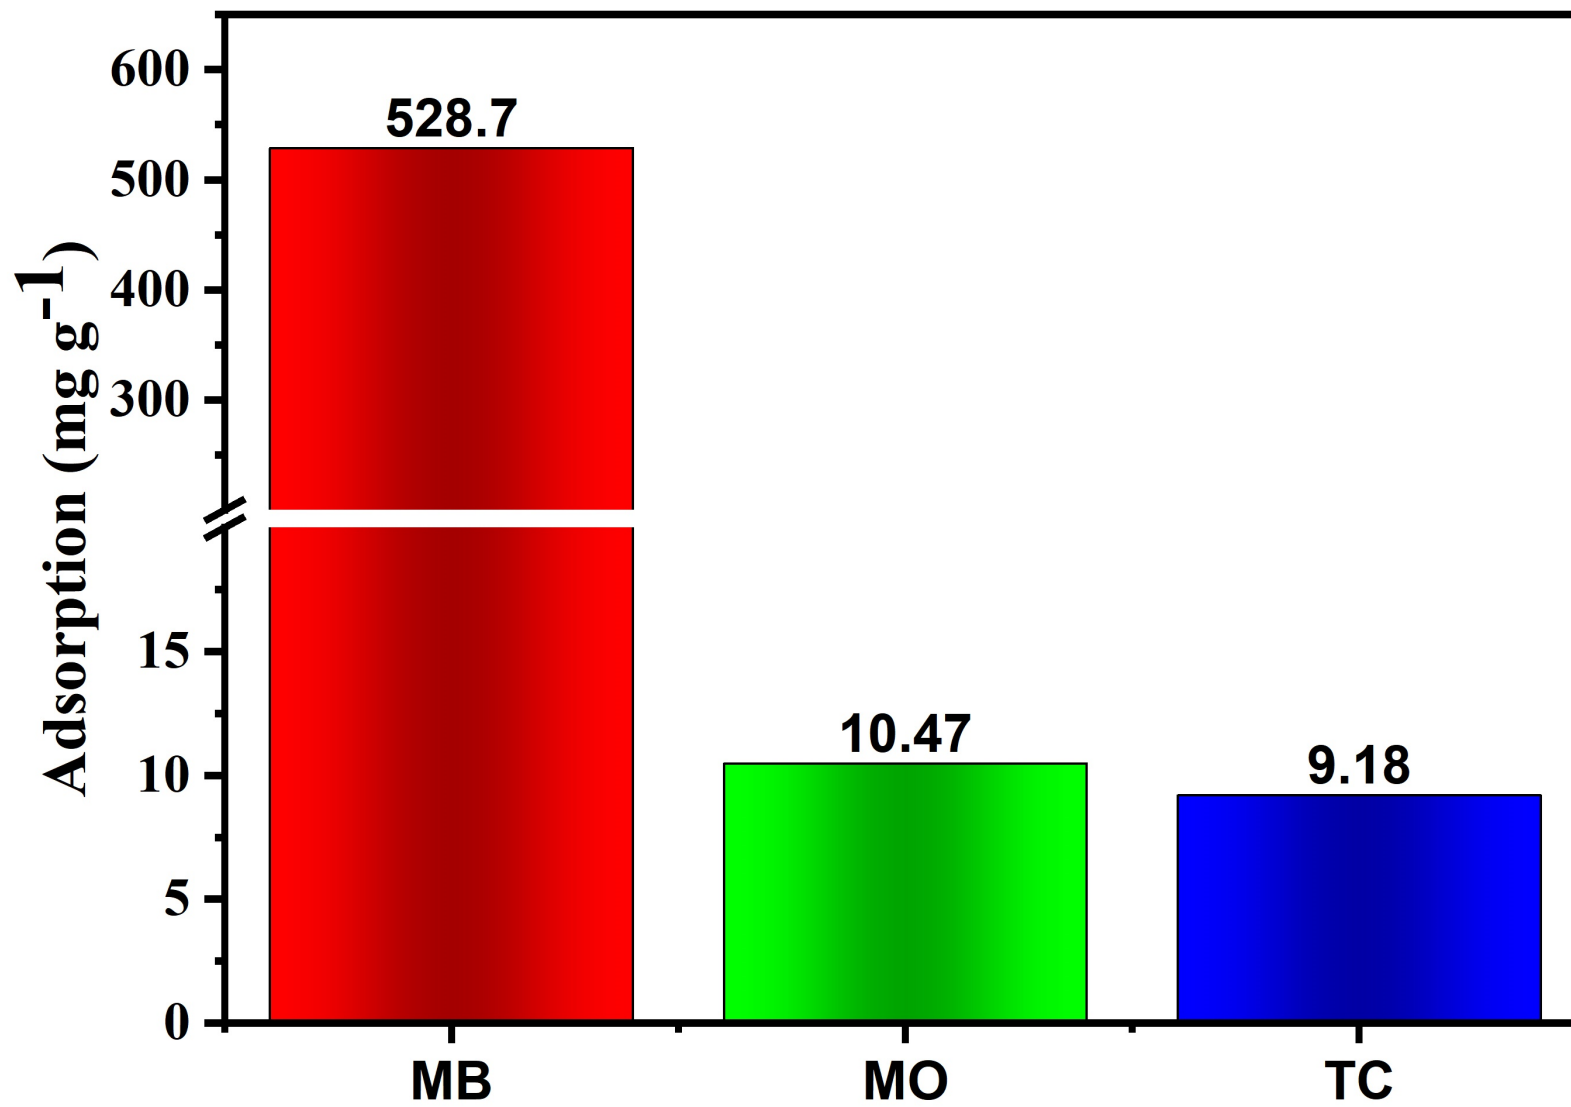

Supplement: d3ra00965c6.pdf [file d3ra00965c6.pdf]

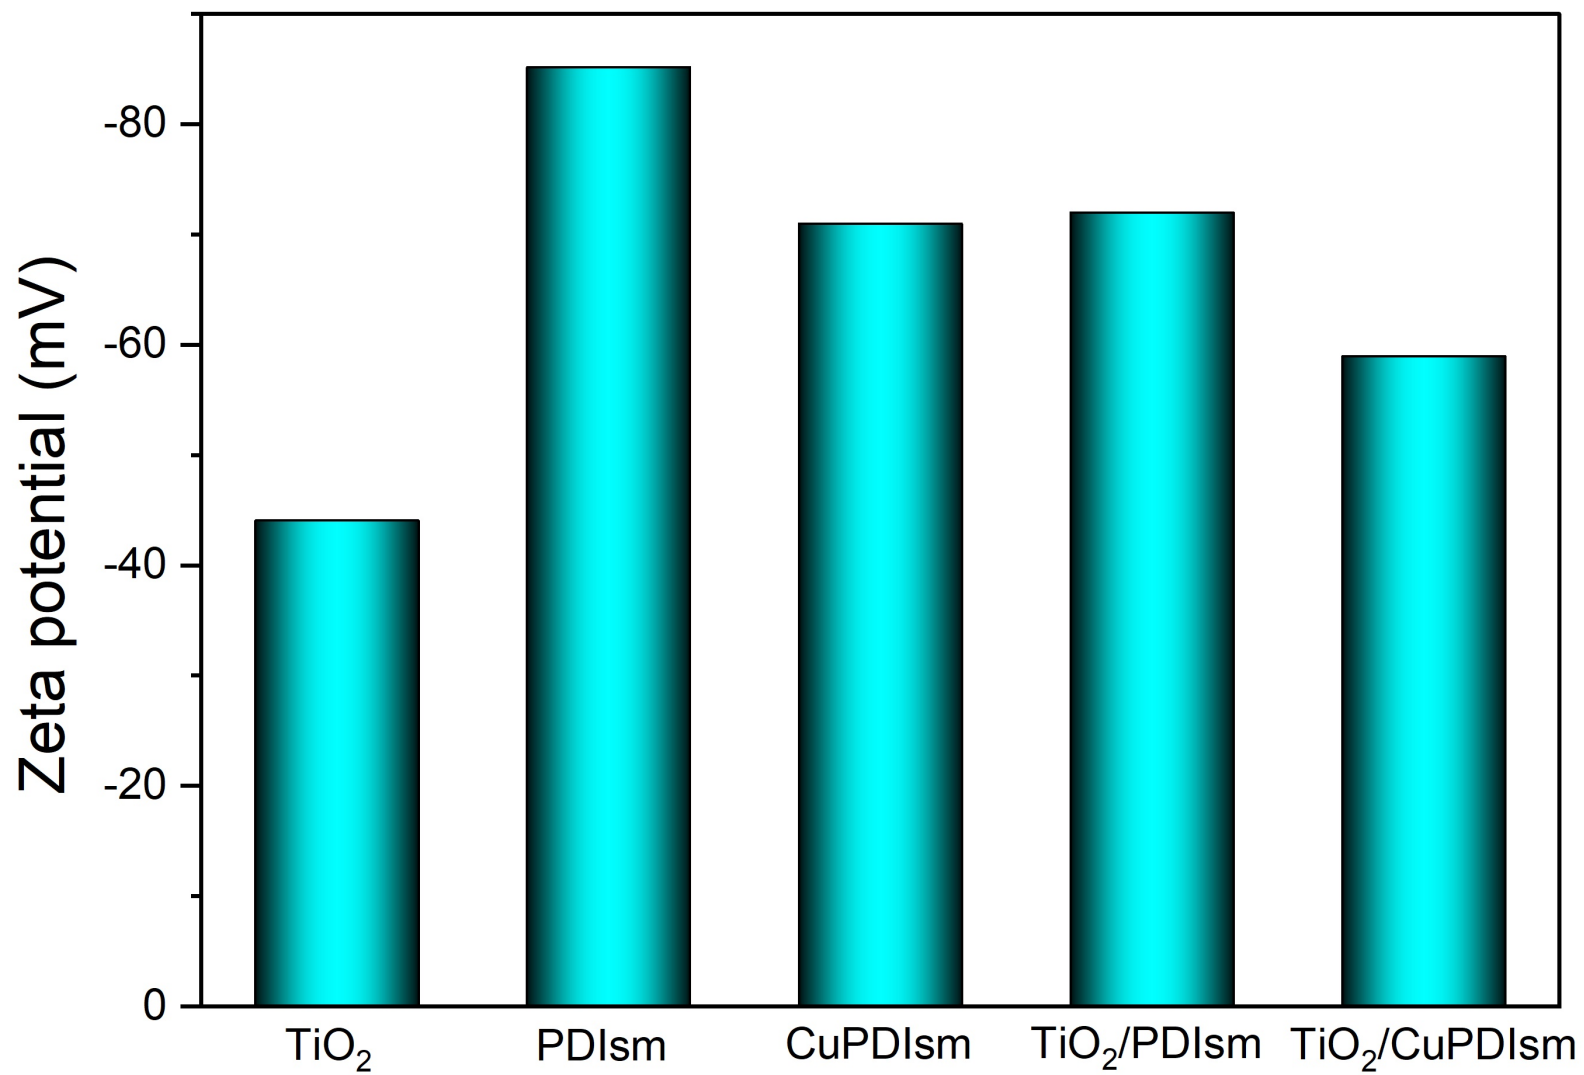

Supplement: d3ra00965c7.pdf [file d3ra00965c7.pdf]

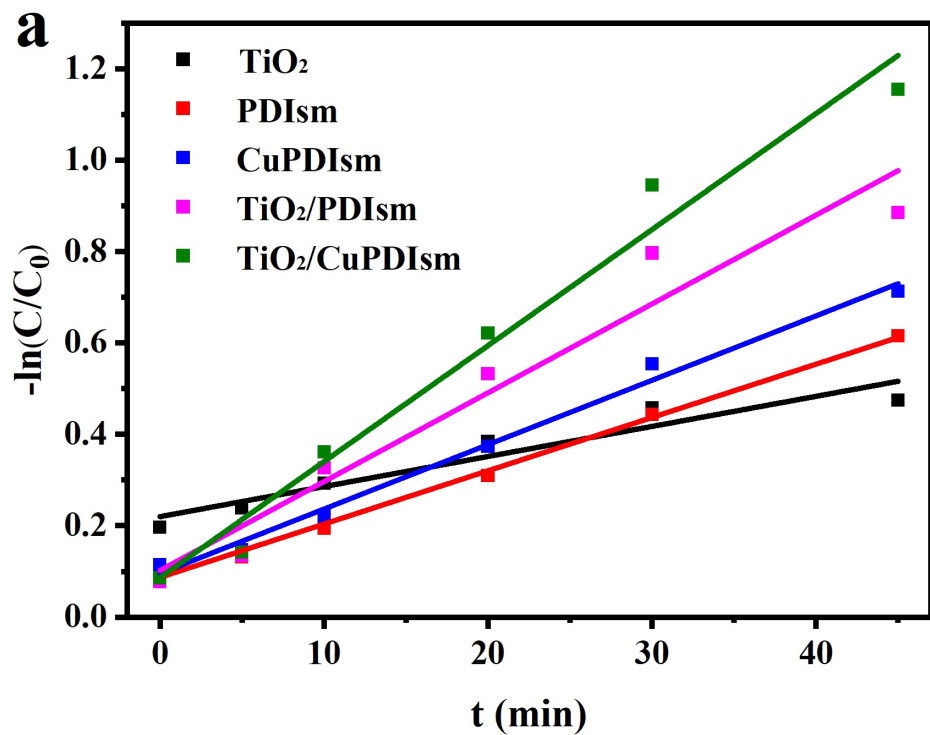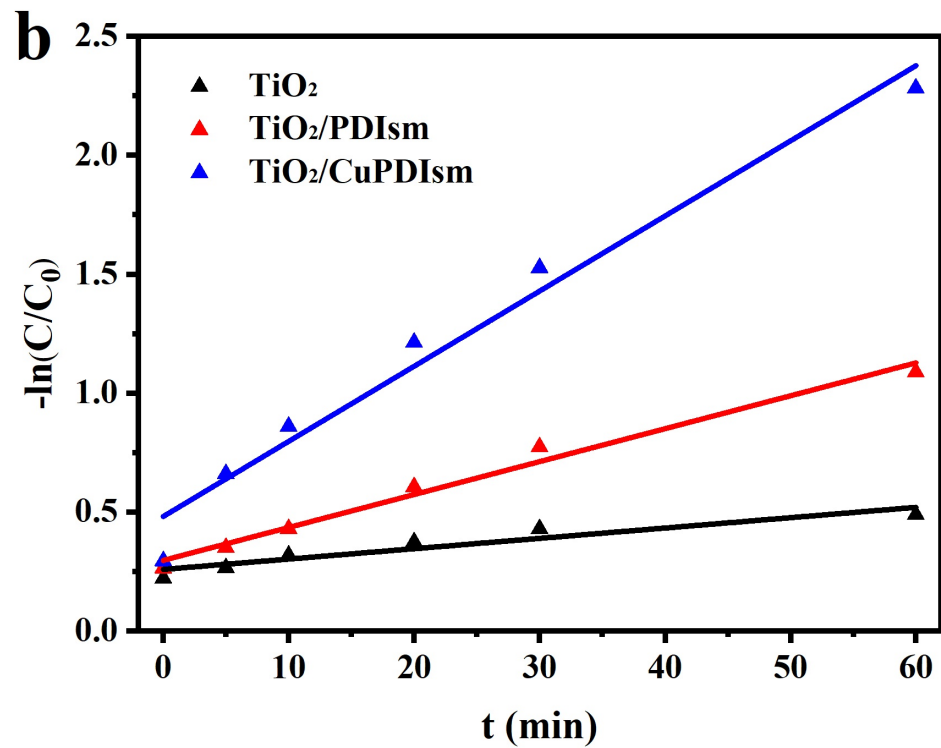

Supplement: d3ra00965c8.pdf [file d3ra00965c8.pdf]

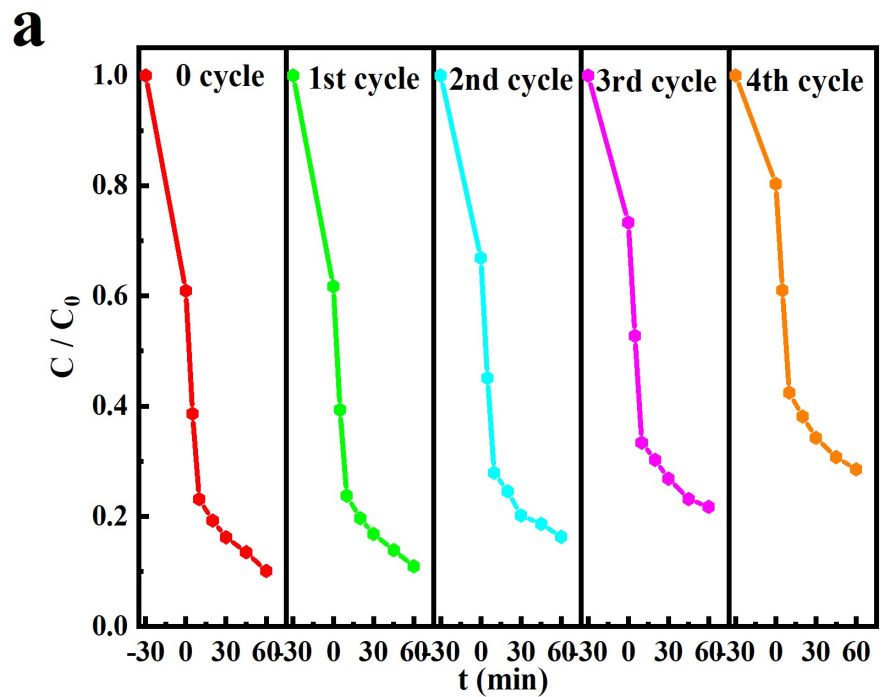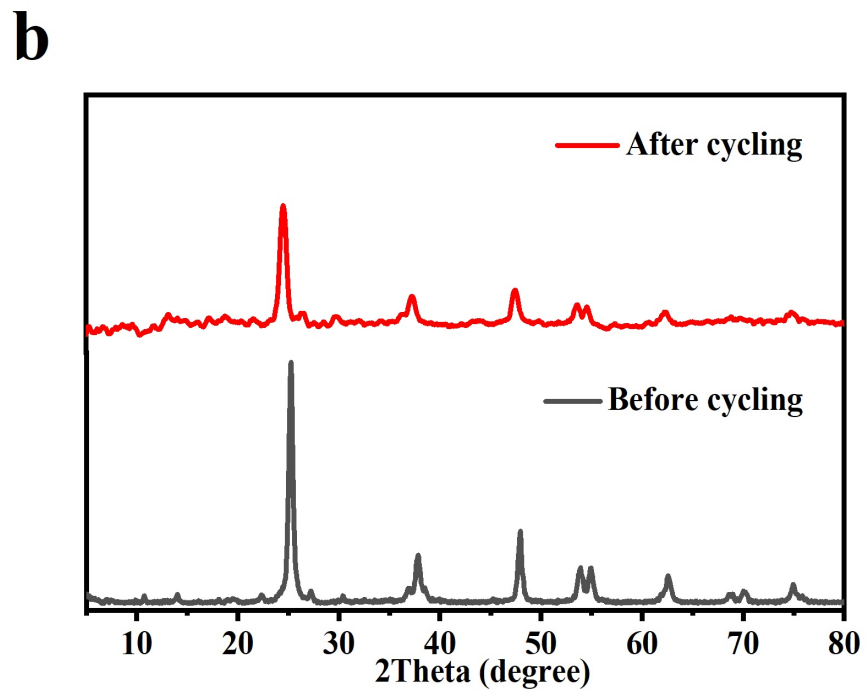

Supplement: d3ra00965c9.pdf [file d3ra00965c9.pdf]
